# Supplementary material for: Detailed Molecular Interactions between Respiratory Syncytial Virus Fusion Protein and the TLR4/MD-2 Complex In Silico
Source: MDPI journal article supplement (doi:10.3390/v14112382), 2022-10-28
Supplement: s1 [file s1]

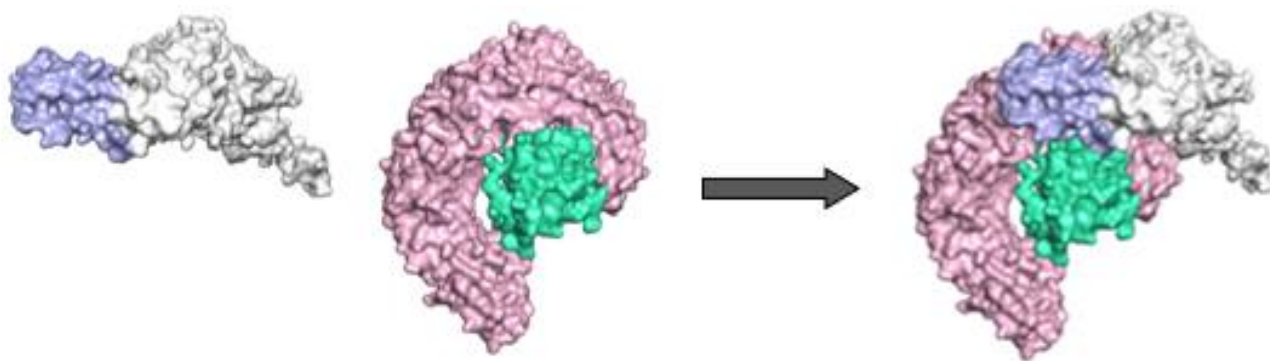

(a)

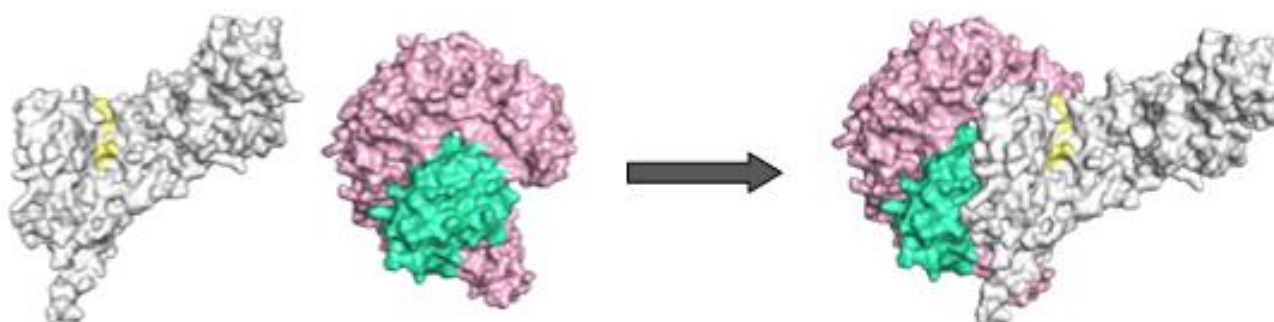

(b)

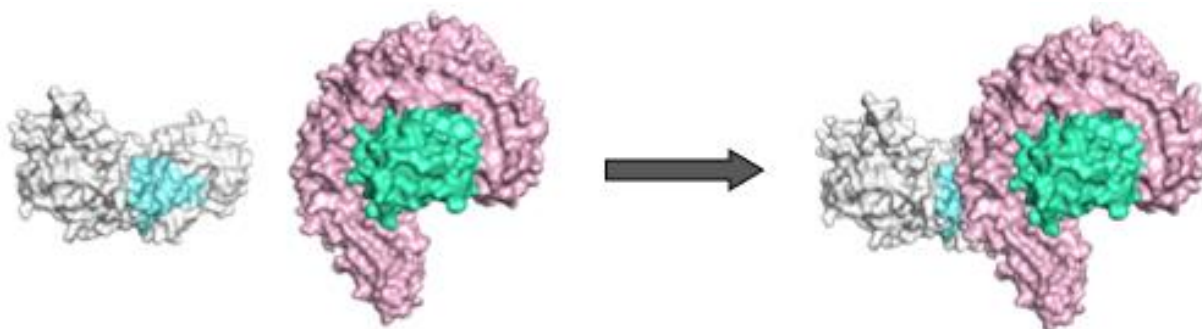

(c)

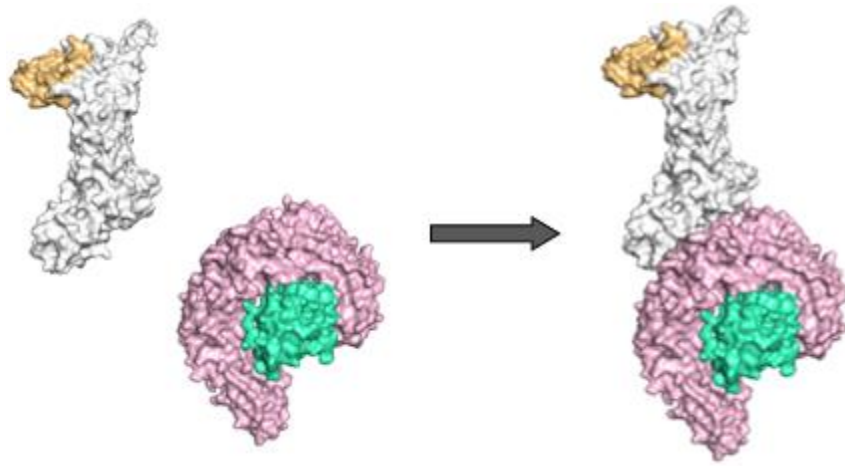

(d)

**Figure S1. Diagram of binding conformations between respiratory syncytial virus (RSV) prefusion proteins and Toll-like receptor 4/myeloid differentiation factor-2 (TLR4/MD-2).** (a) Three-dimensional (3D) structures of RSV prefusion proteins, TLR4/MD-2 complexes, and the protein-protein docking models in which site Ø was designated as the binding site. (b) 3D structures of RSV prefusion proteins, TLR4/MD-2 complexes, and the protein-protein docking models in which site I was specified as the binding site. (c) 3D structures of RSV prefusion proteins, TLR4/MD-2 complexes, and the protein-protein docking models in which site III was specified as the binding site. (d) 3D structures of RSV prefusion proteins, TLR4/MD-2 complexes, and the protein-protein docking models in which site V was specified as the binding site. Sites Ø, I, III, and V in RSV fusion proteins are shown in light purple, light yellow, light blue, and light orange, respectively. The TLR4 and MD-2 are colored pink and light green, respectively.
