# Supplementary material for: Detailed Molecular Interactions between Respiratory Syncytial Virus Fusion Protein and the TLR4/MD-2 Complex In Silico
Source: MDPI journal article supplement (doi:10.3390/v14112382), 2022-10-28
Supplement: s1 [file s1]

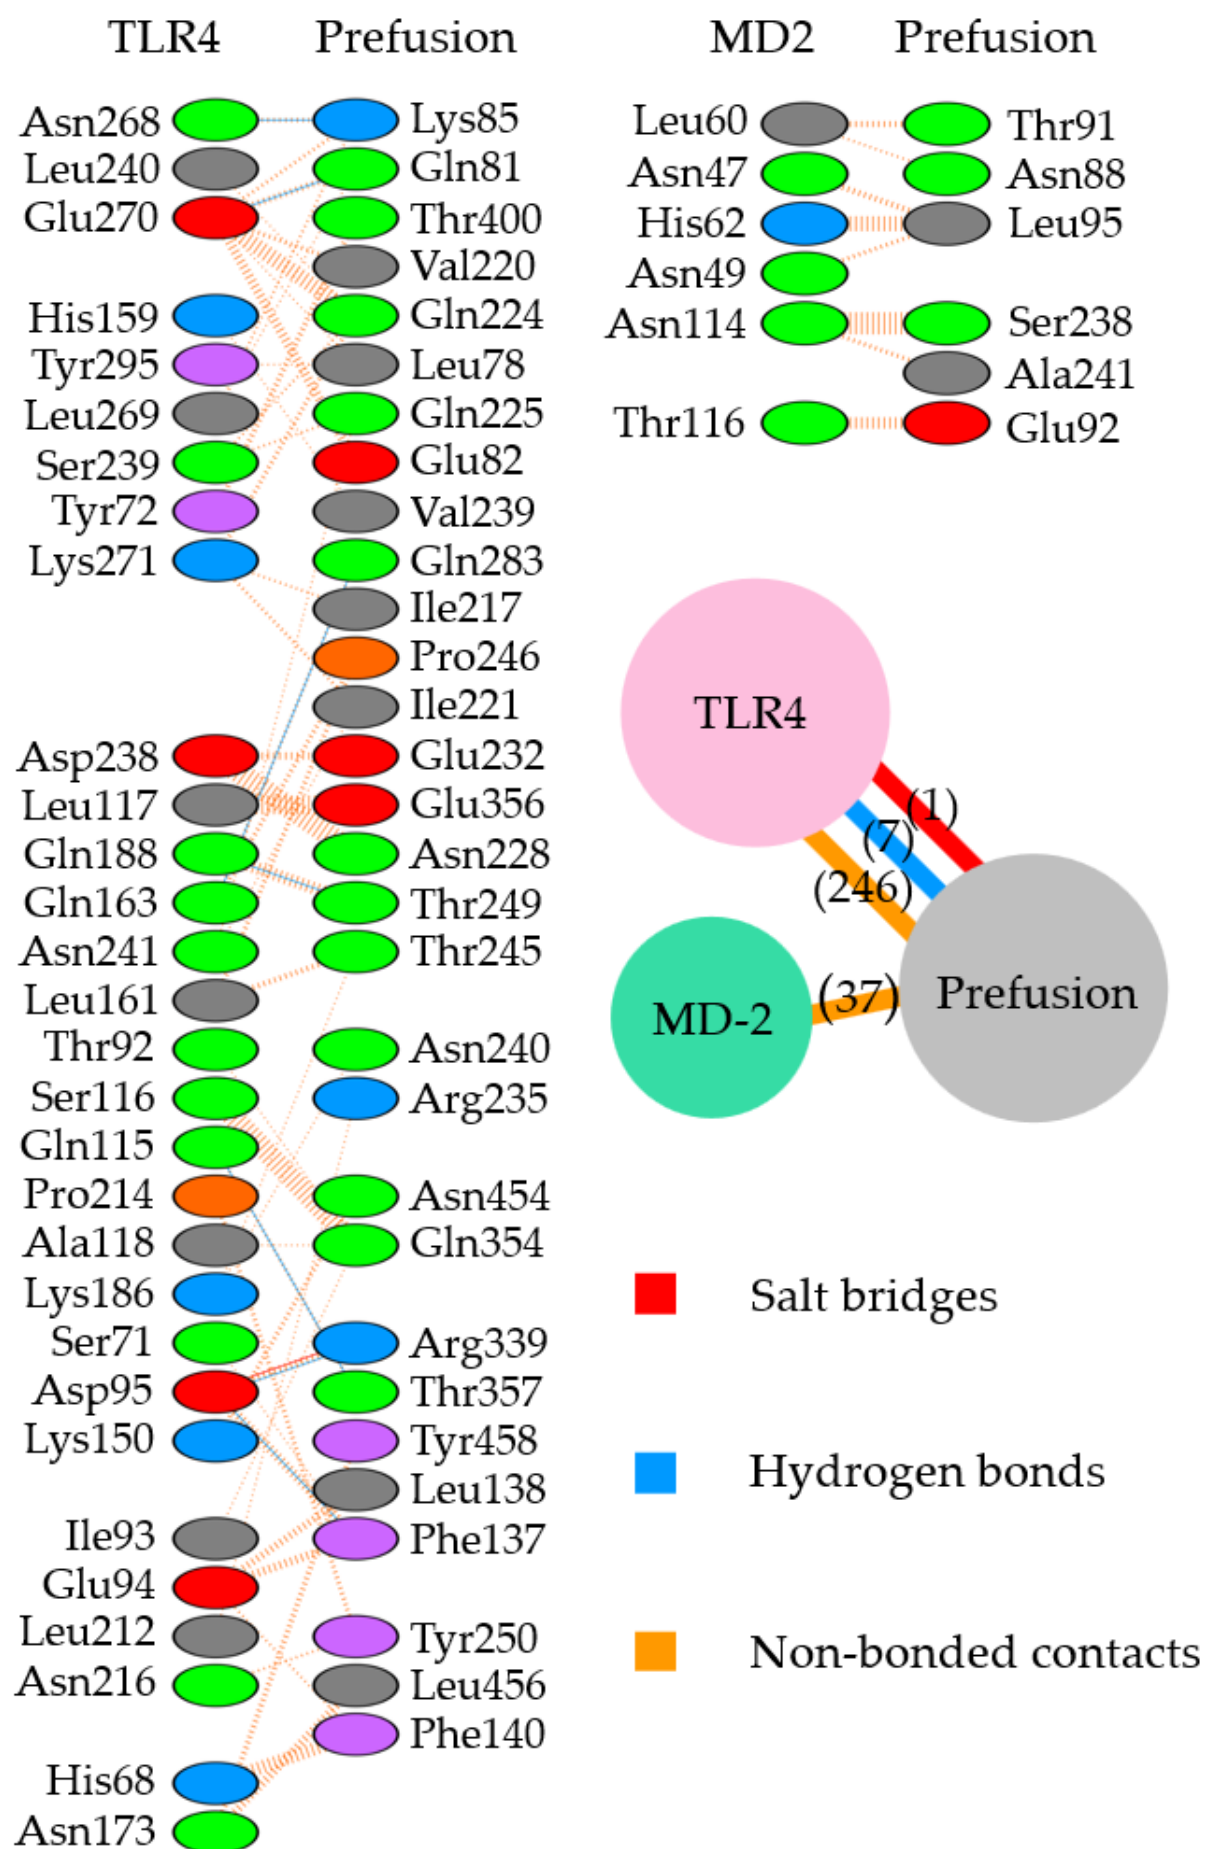

(a)

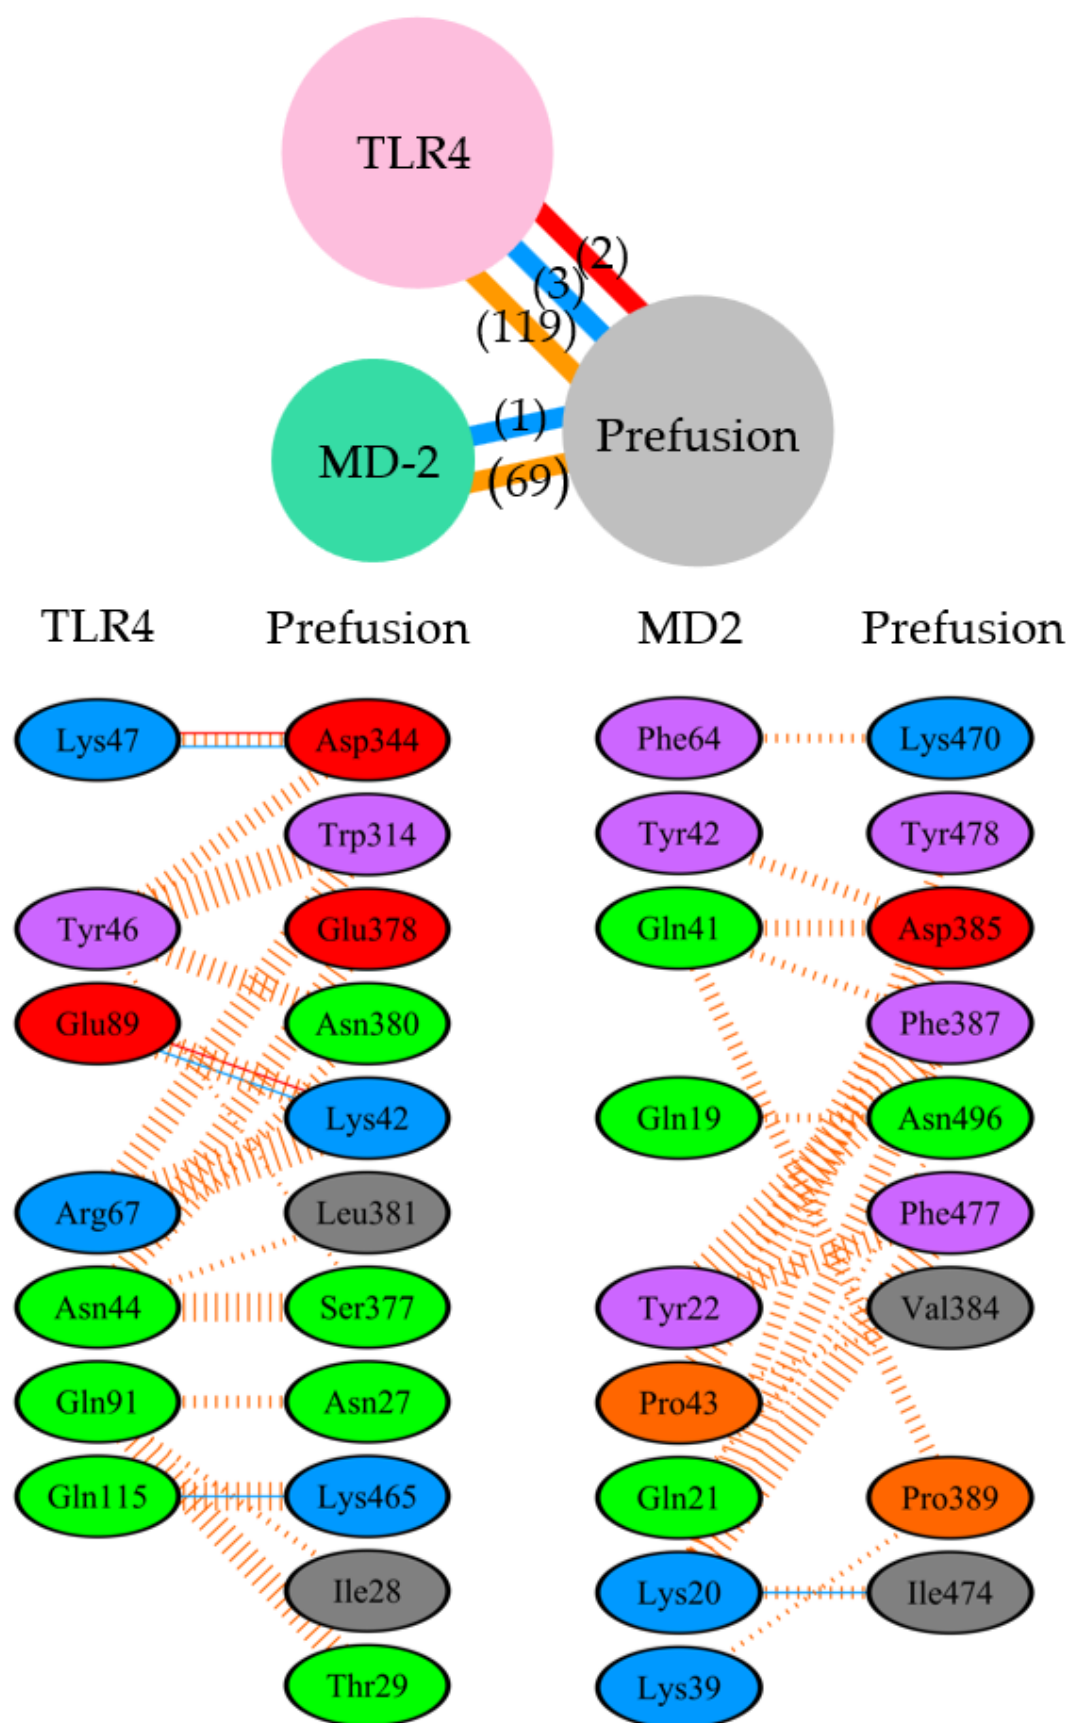

(b)

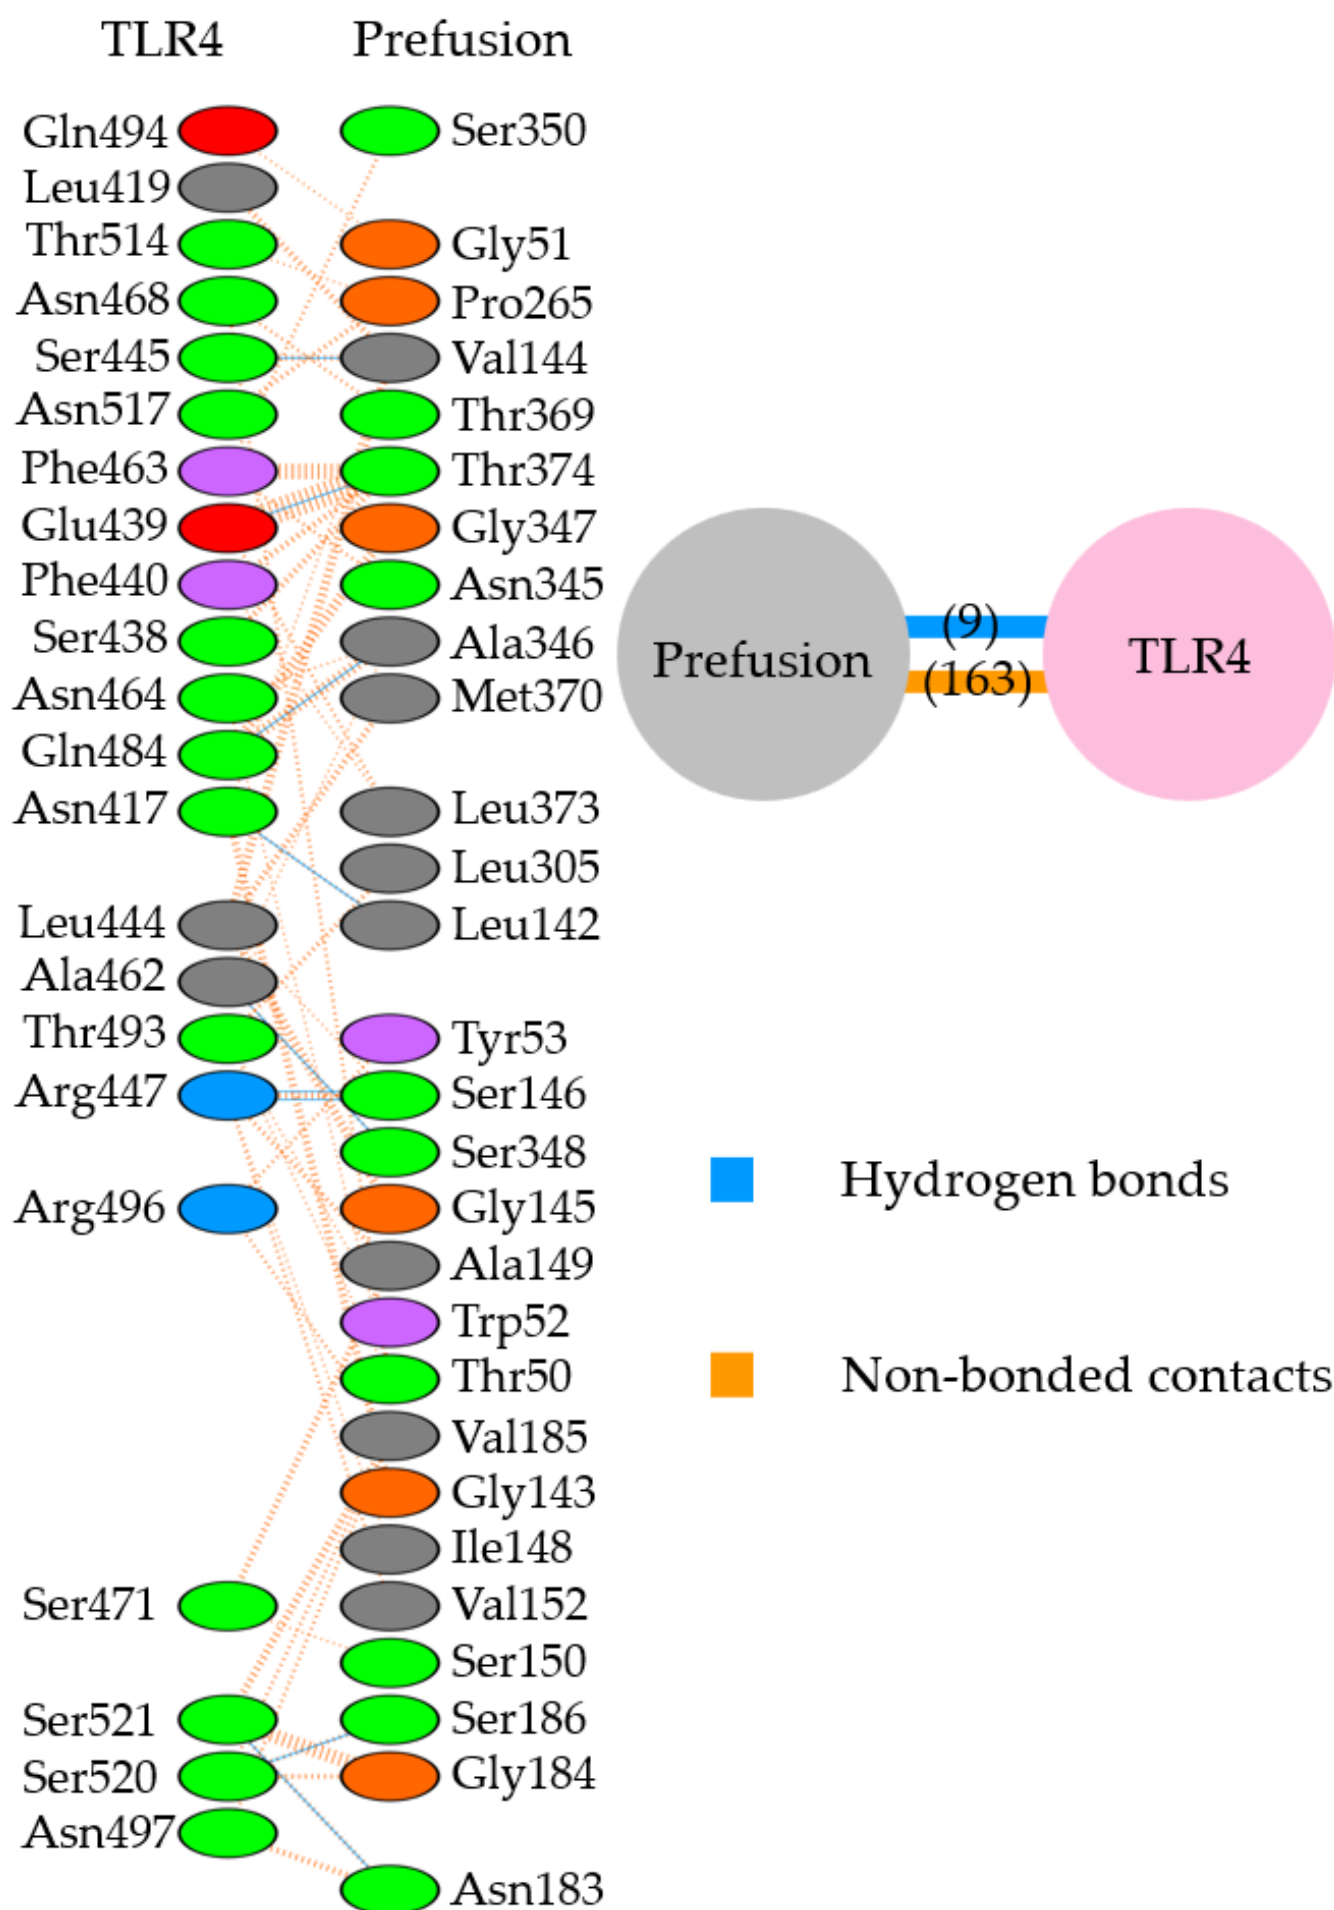

(c)

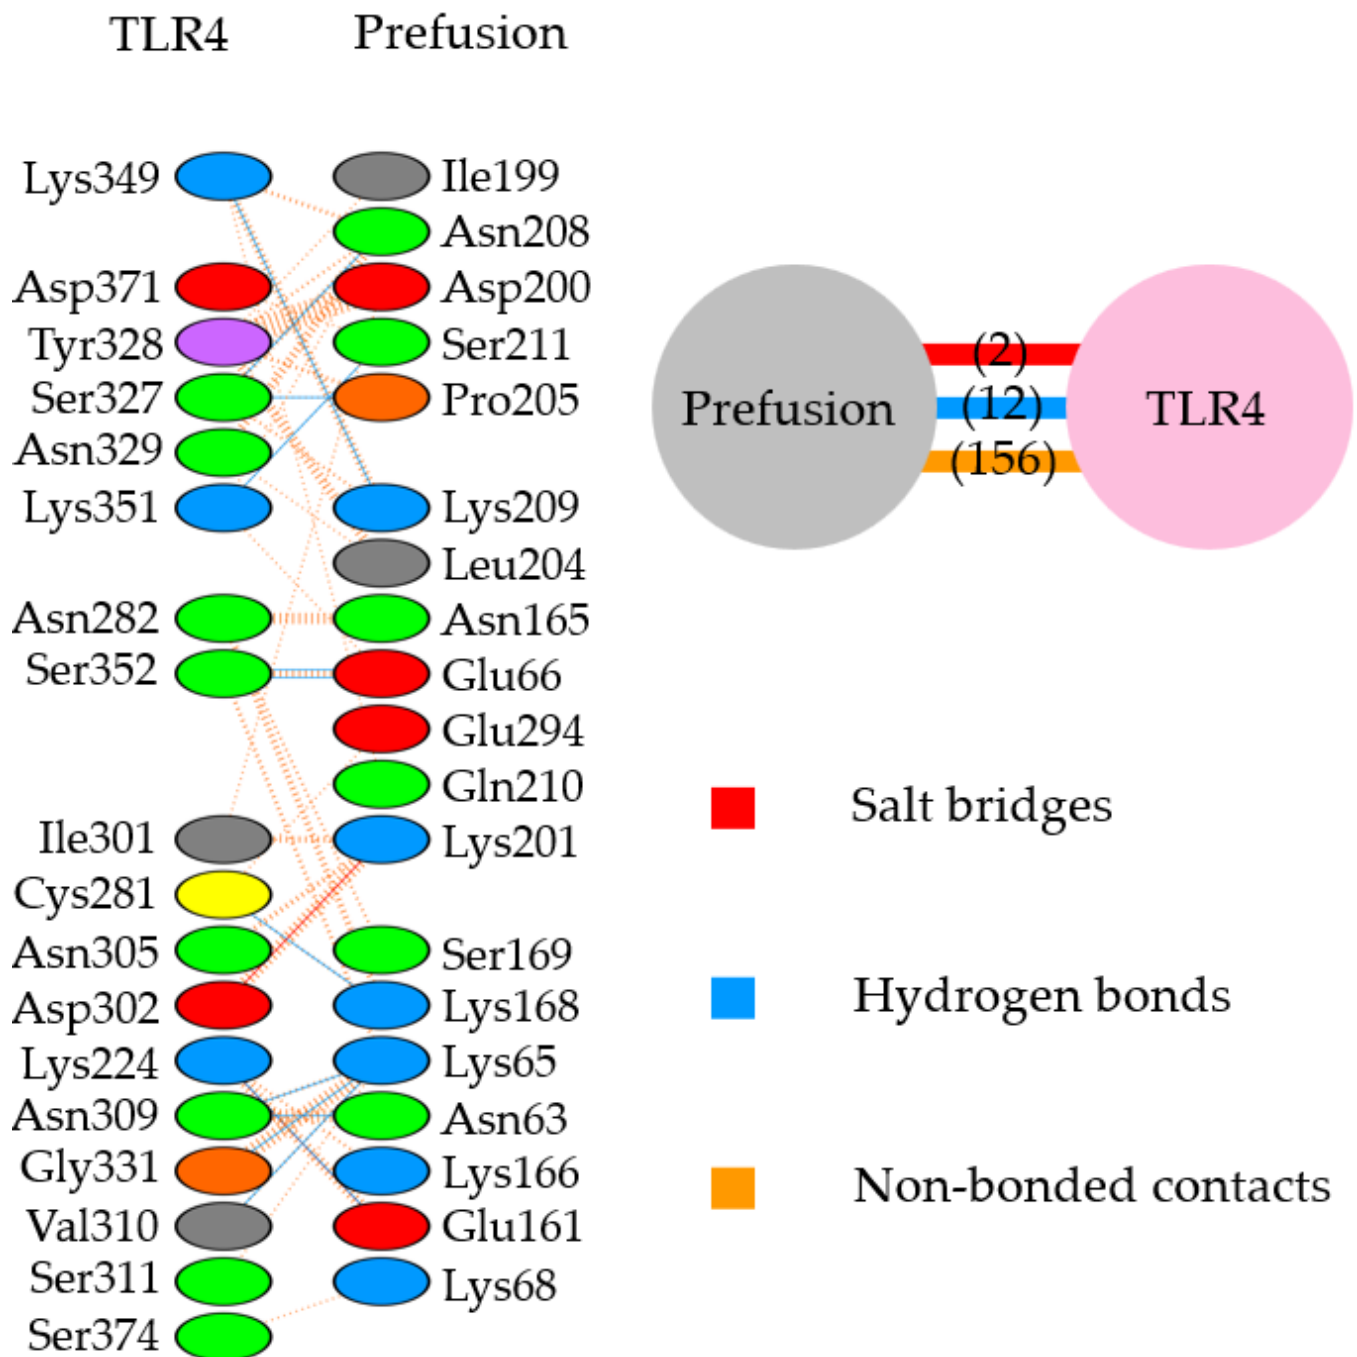

(d)

**Figure S2. Illustration of the molecular interactions between respiratory syncytial virus (RSV) fusion proteins and Toll-like receptor 4/myeloid differentiation factor-2 (TLR4/MD-2).** (a) The molecular interactions between RSV prefusion proteins in which site Ø was designated as the binding site and TLR4/MD-2 complexes. (b) The molecular interactions between RSV prefusion proteins in which site I was specified as the binding site and TLR4/MD-2 complexes. (c) The molecular interactions between RSV prefusion proteins in which site III was specified as the binding site and TLR4/MD-2 complexes. (d) The molecular interactions between RSV prefusion proteins in which site V was specified as the binding site and TLR4/MD-2 complexes. The molecular interactions are depicted as follows: salt bridge (red), hydrogen bonds (blue), and nonbonded contacts (orange). The number on lines represents the number of bonds in the 2D protein diagram.
