# Supplementary material for: Detailed Molecular Interactions between Respiratory Syncytial Virus Fusion Protein and the TLR4/MD-2 Complex In Silico
Source: MDPI journal article supplement (doi:10.3390/v14112382), 2022-10-28
Supplement: s1 [file s1]

**Table S1a.** Consistent molecular interactions and interacting sites of TLR4/MD-2/LPS complex in the HDock and X-ray crystallography data.

| Interaction type   | TLR4/MD-2 |        | LPS |                       |
|--------------------|-----------|--------|-----|-----------------------|
| Hydrogen band      | TLR4      | Asp294 | GMH | Core oligo saccharide |
|                    |           | Tyr296 | KDO |                       |
|                    | TLR4      | Arg264 | PO4 | LipidA                |
|                    | MD-2      | Ser118 | PO4 |                       |
| Nonbonded contacts | TLR4      | Asp294 | GMH | Core oligo saccharide |
|                    |           | Tyr296 | GMH |                       |
|                    |           | Tyr296 | KDO |                       |
|                    |           | Arg322 | PO4 |                       |
|                    |           | Lys341 | KDO |                       |
|                    |           | Lys341 | GMH |                       |
|                    |           | Lys362 | KDO |                       |
|                    | MD-2      | Lys58  | KDO |                       |
|                    | TLR4      | Arg264 | FTT | LipidA                |
|                    |           | Arg264 | PO4 |                       |
|                    | MD-2      | Val24  | FTT |                       |
|                    |           | Ile46  | MYR |                       |
|                    |           | Val48  | FTT |                       |
|                    |           | Phe151 | FTT |                       |
|                    |           | Leu54  | DAO |                       |
|                    |           | Ile63  | FTT |                       |
|                    |           | Ile63  | MYR |                       |
|                    |           | Tyr65  | FTT |                       |
|                    |           | Leu71  | FTT |                       |
|                    |           | Leu74  | FTT |                       |
|                    |           | Phe76  | FTT |                       |
|                    |           | Phe76  | MYR |                       |
|                    |           | Arg90  | DAO |                       |
|                    |           | Glu92  | MYR |                       |
|                    |           | Ile117 | FTT |                       |
|                    |           | Ser118 | PO4 |                       |
|                    |           | Ser118 | PO4 |                       |
|                    |           | Phe119 | FTT |                       |
|                    |           | Ser120 | PA1 |                       |
|                    |           | Ser120 | FTT |                       |
|                    |           | Phe121 | FTT |                       |
|                    |           | Lys122 | FTT |                       |
|                    |           | Phe126 | FTT |                       |
|                    |           | Ser127 | FTT |                       |
|                    |           | Tyr131 | FTT |                       |
|                    |           | Cys133 | FTT |                       |
|                    |           | Phe151 | FTT |                       |

TLR4, Toll-like receptor 4; MD-2, Myeloid differentiation factor-2; LPS, Lipopolysaccharides; GMH, L glycerol- $\alpha$ -D-manno-Heptopyranose; KDO, 3-deoxy- $\alpha$ -D-manno-oct-2-ulopyranosonic acid; PO4, Phosphoric acid; FTT, 3-Hydroxy-Tetradecanoic acid; MYR, Myristic acid; DAO, Dodecanoic acid; PA1, 2-amino-2-deoxy- $\alpha$ -D-glucophranose.

**Table S1b.** Inconsistent molecular interactions and interacting sites of TLR4/MD-2/LPS complex in the HDock and X-ray crystallography data.

| Interaction type   | TLR4/MD-2 |        | LPS |                       |
|--------------------|-----------|--------|-----|-----------------------|
| Hydrogen bonds     | TLR4      | Glu321 | GMH | Core oligo saccharide |
|                    |           | Arg322 | GMH |                       |
|                    |           | Lys341 | GMH |                       |
|                    |           | Lys362 | KDO |                       |
|                    | MD-2      | Lys122 | FTT | LipidA                |
| Nonbonded contacts | TLR4      | Arg264 | PA1 | Core oligo saccharide |
|                    |           | Tyr296 | GMH |                       |
|                    |           | Tyr296 | GMH |                       |
|                    |           | Thr319 | KDO |                       |
|                    |           | Glu321 | GMH |                       |
|                    |           | Arg322 | GMH |                       |
|                    | MD-2      | Ser120 | KDO | LipidA                |
|                    | MD-2      | Glu92  | DAO |                       |
|                    |           | Tyr102 | FTT |                       |
|                    |           | Tyr102 | PO4 |                       |
|                    |           | Phe147 | FTT |                       |

TLR4, Toll-like receptor 4; MD-2, Myeloid differentiation factor-2; LPS, Lipopolysaccharides; GMH, L glycerol- $\alpha$ -D-manno-Heptopyranose; KDO, 3-deoxy- $\alpha$ -D-manno-oct-2-ulopyranosonic acid; PO4, Phosphoric acid; FTT, 3-Hydroxy-Tetradecanoic acid; MYR, Myristic acid; DAO, Dodecanoic acid; PA1, 2-amino-2-deoxy- $\alpha$ -D-glucopyranose
