# Supplementary material for: Detailed Molecular Interactions between Respiratory Syncytial Virus Fusion Protein and the TLR4/MD-2 Complex In Silico
Source: MDPI journal article supplement (doi:10.3390/v14112382), 2022-10-28
Supplement: s1 [file s1]

**Table S2a.** Consistent molecular interactions and interacting sites of RSV prefusion protein/antibody CR9501 complex in the HDock and Cryo-electron microscopy (cryo-EM) structure data.

| Interaction type   | Prefusion | Antibody CR9501 |                 |
|--------------------|-----------|-----------------|-----------------|
| Hydrogen bonds     | Asn63     | Ile100A*        | Fab heavy chain |
|                    | Asn63     | Ser100B*        |                 |
|                    | Ile64     | Tyr98           |                 |
|                    | Ile64     | Val99           |                 |
|                    | Lys87     | Tyr98           |                 |
|                    | Gln94     | Leu100*         |                 |
|                    | Glu294    | Ile100A*        |                 |
|                    | Asn165    | Asp28           | Fab light chain |
|                    | Lys168    | Tyr32           |                 |
|                    | Asn208    | Thr56           |                 |
|                    | Glu294    | Gln92           |                 |
| Nonbonded contacts | Leu61     | Ile100A*        | Fab heavy chain |
|                    | Ser62     | Ile100A*        |                 |
|                    | Asn63     | Ile100A*        |                 |
|                    | Asn63     | Val99           |                 |
|                    | Asn63     | Leu100*         |                 |
|                    | Asn63     | Ser100B*        |                 |
|                    | Ile64     | Val99           |                 |
|                    | Ile64     | Tyr98           |                 |
|                    | Lys65     | Tyr98           |                 |
|                    | Glu66     | Asp101          |                 |
|                    | Glu66     | Tyr34           |                 |
|                    | Ile67     | Tyr98           |                 |
|                    | Asp84     | Tyr98           |                 |
|                    | Lys87     | Tyr98           |                 |
|                    | Lys87     | Asp32           |                 |
|                    | Val90     | Ile100A*        |                 |
|                    | Gln94     | Leu100*         |                 |
|                    | Lys293    | Ile100A*        |                 |
|                    | Glu294    | Ile100A*        |                 |
|                    | Glu295    | Ile100A*        |                 |
|                    | Lys65     | Tyr49           | Fab light chain |
|                    | Lys65     | Asn53           |                 |
|                    | Asn165    | Gln92           |                 |
|                    | Asn165    | Asp28           |                 |
|                    | Lys168    | Tyr67           |                 |
|                    | Lys168    | Ser30           |                 |
|                    | Lys168    | Tyr32           |                 |

|              |        |       |                 |
|--------------|--------|-------|-----------------|
|              | Ser169 | Tyr67 |                 |
|              | Leu172 | Tyr67 |                 |
|              | Asp200 | Asn53 |                 |
|              | Leu204 | Tyr49 |                 |
|              | Asn208 | Thr56 |                 |
|              | Asn208 | Tyr49 |                 |
|              | Glu294 | Tyr32 |                 |
|              | Glu294 | Gln92 |                 |
|              | Glu295 | Tyr32 |                 |
|              | Glu295 | Thr31 |                 |
| Salt bridges | Lys87  | Asp32 | Fab heavy chain |

Fab, fragment antigen-binding region; RSV, respiratory syncytial virus.

\* The matching amino acid sequence numbers for Ile100A, Ser100B and Leu100 reflect the Kabat numbering scheme.

**Table S2b.** Inconsistent molecular interactions and interacting sites of RSV prefusion protein/antibody CR9501 complex in the HDock and Cryo-electron microscopy (cryo-EM) structure data.

| Interaction type   | Prefusion | Antibody CR9501 |                 |
|--------------------|-----------|-----------------|-----------------|
| Hydrogen bonds     | Glu66     | Tyr34           | Fab heavy chain |
|                    | Asp84     | Tyr98           |                 |
|                    | Lys87     | Asp32           |                 |
|                    | Glu295    | Ile100A*        |                 |
|                    | Asn208    | Tyr49           | Fab light chain |
|                    | Glu295    | Thr31           |                 |
|                    | Asp200    | Asn53           |                 |
| Nonbonded contacts | Asn63     | Trp100F*        | Fab heavy chain |
|                    | Ile64     | Ala97           |                 |
|                    | Lys65     | Ala97           |                 |
|                    | Lys65     | Trp100F*        |                 |
|                    | Glu66     | Gly96           |                 |
|                    | Glu66     | Val2            |                 |
|                    | Leu83     | Tyr98           |                 |
|                    | Tyr86     | Val99           |                 |
|                    | Lys87     | Val99           |                 |
|                    | Lys87     | Asn33           |                 |
|                    | Val90     | Val99           |                 |
|                    | Asn165    | Tyr93           | Fab light chain |
|                    | Lys196    | Thr31           |                 |
|                    | Leu204    | Leu54           |                 |
|                    | Leu204    | Asn53           |                 |
|                    | Asn208    | Glu55           |                 |
|                    | Asn208    | Leu54           |                 |
|                    | Gly162    | Tyr93           |                 |
|                    | Lys168    | Thr31           |                 |

Fab, fragment antigen-binding region; RSV, respiratory syncytial virus.

\* The matching amino acid sequence numbers for Ile100A and Trp100F reflect the Kabat numbering scheme.
