# Supplementary material for: Detailed Molecular Interactions between Respiratory Syncytial Virus Fusion Protein and the TLR4/MD-2 Complex In Silico
Source: MDPI journal article supplement (doi:10.3390/v14112382), 2022-10-28
Supplement: s1 [file s1]

**Table S3.** The sites with a binding probability greater than 0.5 predicted by ScanNet in prefusion and postfusion protein.

| prefusion residues | postfusion residues |
|--------------------|---------------------|
| Gly51              | Gly51               |
| Trp52              | Trp52               |
| Tyr53              | Tyr53               |
| Thr54              | Thr54               |
| Gly139             | Ser55               |
| Phe140             | Val56               |
| Leu141             | Ile57               |
| Leu142             | Thr58               |
| Gly143             | Ile59               |
| Val144             | Glu60               |
| Gly145             | Val76               |
| Ser146             | Leu78               |
| Ala147             | Gln81               |
| Ile148             | Glu82               |
| Ala149             | Lys85               |
| Ser150             | Leu96               |
| Val152             | Met97               |
| Ala153             | Lys156              |
| Val154             | Leu160              |
| Lys156             | Glu163              |
| Val185             | Val164              |
| Ile217             | Lys166              |
| Ile221             | Ile167              |
| Gln224             | Lys168              |
| Gln225             | Ala170              |
| Asn228             | Leu171              |
| Ala241             | Leu172              |
| Val243             | Ser173              |
| Thr245             | Thr174              |
| Pro265             | Asn175              |
| Tyr286             | Ala177              |
| Pro320             | Val178              |
| Met370             | Val179              |

|        |        |
|--------|--------|
| Ser372 | Ser180 |
| Leu373 | Leu181 |
| Thr374 | Ser182 |
| Leu375 | Gly184 |
| Pro376 | Val185 |
| Ser398 | Val187 |
| Thr400 | Leu188 |
| Val402 | Thr189 |
| Ser404 | Lys191 |
| Ile407 | Val192 |
| Arg429 | Asp194 |
| Ile431 | Leu195 |
| Ile432 | Lys196 |
| Asn454 | Tyr198 |
| Thr455 | Ile199 |
| Leu456 | Asp200 |
| Tyr457 | Gln202 |
| Tyr458 | Leu203 |
| Asp479 | Leu204 |
| Leu481 | Ile206 |
| Val482 | Val207 |
| Ile499 | Asn208 |
| Ser502 | Gln210 |
| Leu503 | Ser211 |
| Phe505 | Ile214 |
| Ile506 | Ile217 |
| Lys508 | Glu218 |
| Ser509 | Ile221 |
| Asp510 | Glu222 |
| Leu512 | Gln224 |
| Leu513 | Gln225 |
|        | Lys226 |
|        | Asn228 |
|        | Leu231 |
|        | Glu232 |
|        | Val239 |

Asn240  
Ala241  
Val243  
Thr245  
Pro246  
Ser255  
Glu256  
Leu258  
Ser259  
Leu260  
Asn262  
Asp263  
Pro265  
Asn268  
Asp269  
Lys272  
Ser275  
Asn276  
Tyr286  
Ile288  
Ser290  
Ile291  
Val296  
Val300  
Gln302  
Ser404  
Ile407  
Lys421  
Thr423  
Ile431  
Asn454  
Thr455  
Leu456  
Tyr457  
Tyr458  
Lys461

Gly464  
Lys465  
Ser466  
Leu467  
Tyr468  
Val469  
Lys470  
Gly471  
Glu472  
Pro473  
Ile474  
Ile475  
Asn476  
Phe477  
Tyr478  
Asp479  
Pro480  
Leu481  
Val482  
Phe483  
Pro484  
Ser485  
Asp486  
Glu487  
Phe488  
Asp489  
Ser491  
Ile492  
Gln494  
Val495  
Asn496  
Lys498  
Ile499  
Gln501  
Ser502  
Leu503

Phe505

Ile506

Arg507

Lys508

Ser509

Asp510

Leu512

Leu513

His514

Asn515

Val516

Asn517

---
